# Supplementary material for: Testing the potential of a ribosomal 16S marker for DNA metabarcoding of insects
Source: PeerJ. 2016 Apr 19;4:e1966. doi: 10.7717/peerj.1966 (PMC4841222; doi:10.7717/peerj.1966)
Supplement: Figure S1 — 16S Fusion primers developed in this study. They include flow cell and sequencing primer binding regions for current Illumina sequencers. The amplified fragment has a size fo ∾157 bp and can be sequenced directly after purification (one step PCR). Up to 10 samples can be uniquely tagged from forward and reverse direction and pooled in one NextSeq run. The bases used for shifting on Ins_F and Ins_R can be used to uniquely tag samples (inline barcodes). It is recommended that all 10 primer pairs are used in the following combination to maximize sequence diversity and reduce effects of tag switching by uniquely tagging samples from both sides: P5_Ins_R0+P7_Ins_F4, P5_Ins_R1+P7_Ins_F3, P5_Ins_R2+P7_Ins_F2, P5_Ins_R3+P7_Ins_F1, P5_Ins_R4+P7_Ins_F0, P5_Ins_F0+P7_Ins_R4, P5_Ins_F1+P7_Ins_R3, P5_Ins_F2+P7_Ins_R2, P5_Ins_F3+P7_Ins_R1, P5_Ins_F4+P7_Ins_R0. [file peerj-04-1966-s001.pdf]

|                                                           |                               |                                       |                                                                     |
|-----------------------------------------------------------|-------------------------------|---------------------------------------|---------------------------------------------------------------------|
| P5_Ins_F0                                                 | AATGATACGGCGACCACCGAGATCTACAC | TCTTTCCCTACACGACGCTCTTCCGATCT         | RGACGAGAAGACCCTATARA                                                |
| P5_Ins_F1                                                 | AATGATACGGCGACCACCGAGATCTACAC | TCTTTCCCTACACGACGCTCTTCCGATCT         | T <sup>N</sup> RGACGAGAAGACCCTATARA                                 |
| P5_Ins_F2                                                 | AATGATACGGCGACCACCGAGATCTACAC | TCTTTCCCTACACGACGCTCTTCCGATCT         | CT <sup>N</sup> RGACGAGAAGACCCTATARA                                |
| P5_Ins_F3                                                 | AATGATACGGCGACCACCGAGATCTACAC | TCTTTCCCTACACGACGCTCTTCCGATCT         | GTT <sup>N</sup> RGACGAGAAGACCCTATARA                               |
| P5_Ins_F4                                                 | AATGATACGGCGACCACCGAGATCTACAC | TCTTTCCCTACACGACGCTCTTCCGATCT         | AACT <sup>N</sup> RGACGAGAAGACCCTATARA                              |
| P5_Ins_R0                                                 | AATGATACGGCGACCACCGAGATCTACAC | TCTTTCCCTACACGACGCTCTTCCGATCT         | ACGCTGTTATCCCTAARGTA                                                |
| P5_Ins_R1                                                 | AATGATACGGCGACCACCGAGATCTACAC | TCTTTCCCTACACGACGCTCTTCCGATCT         | T <sup>N</sup> ACGCTGTTATCCCTAARGTA                                 |
| P5_Ins_R2                                                 | AATGATACGGCGACCACCGAGATCTACAC | TCTTTCCCTACACGACGCTCTTCCGATCT         | TC <sup>N</sup> ACGCTGTTATCCCTAARGTA                                |
| P5_Ins_R3                                                 | AATGATACGGCGACCACCGAGATCTACAC | TCTTTCCCTACACGACGCTCTTCCGATCT         | GCT <sup>N</sup> ACGCTGTTATCCCTAARGTA                               |
| P5_Ins_R4                                                 | AATGATACGGCGACCACCGAGATCTACAC | TCTTTCCCTACACGACGCTCTTCCGATCT         | CGTT <sup>N</sup> ACGCTGTTATCCCTAARGTA                              |
| flow cell bind P5                      sequ primer 1 bind |                               |                                       | Ins_F / Ins_R (Taberlet unpub.)<br>N = shift (Lundberg et al. 2013) |
|                                                           |                               |                                       |                                                                     |
| P7_Ins_R0                                                 | CAAGCAGAAGACGGCATACGAGAT      | CGGTCTCGGCATTCTTGCTGAACCGCTCTTCCGATCT | ACGCTGTTATCCCTAARGTA                                                |
| P7_Ins_R1                                                 | CAAGCAGAAGACGGCATACGAGAT      | CGGTCTCGGCATTCTTGCTGAACCGCTCTTCCGATCT | T <sup>N</sup> ACGCTGTTATCCCTAARGTA                                 |
| P7_Ins_R2                                                 | CAAGCAGAAGACGGCATACGAGAT      | CGGTCTCGGCATTCTTGCTGAACCGCTCTTCCGATCT | TC <sup>N</sup> ACGCTGTTATCCCTAARGTA                                |
| P7_Ins_R3                                                 | CAAGCAGAAGACGGCATACGAGAT      | CGGTCTCGGCATTCTTGCTGAACCGCTCTTCCGATCT | GCT <sup>N</sup> ACGCTGTTATCCCTAARGTA                               |
| P7_Ins_R4                                                 | CAAGCAGAAGACGGCATACGAGAT      | CGGTCTCGGCATTCTTGCTGAACCGCTCTTCCGATCT | CGTT <sup>N</sup> ACGCTGTTATCCCTAARGTA                              |
| P7_Ins_F0                                                 | CAAGCAGAAGACGGCATACGAGAT      | CGGTCTCGGCATTCTTGCTGAACCGCTCTTCCGATCT | RGACGAGAAGACCCTATARA                                                |
| P7_Ins_F1                                                 | CAAGCAGAAGACGGCATACGAGAT      | CGGTCTCGGCATTCTTGCTGAACCGCTCTTCCGATCT | T <sup>N</sup> RGACGAGAAGACCCTATARA                                 |
| P7_Ins_F2                                                 | CAAGCAGAAGACGGCATACGAGAT      | CGGTCTCGGCATTCTTGCTGAACCGCTCTTCCGATCT | CT <sup>N</sup> RGACGAGAAGACCCTATARA                                |
| P7_Ins_F3                                                 | CAAGCAGAAGACGGCATACGAGAT      | CGGTCTCGGCATTCTTGCTGAACCGCTCTTCCGATCT | GTT <sup>N</sup> RGACGAGAAGACCCTATARA                               |
| P7_Ins_F4                                                 | CAAGCAGAAGACGGCATACGAGAT      | CGGTCTCGGCATTCTTGCTGAACCGCTCTTCCGATCT | AACT <sup>N</sup> RGACGAGAAGACCCTATARA                              |
| flow cell bind P7                      sequ primer 2 bind |                               |                                       | Ins_F / Ins_R (Taberlet unpub.)<br>N = shift (Lundberg et al. 2013) |

**Figure S1. 16S Fusion primers developed in this study.** They include flow cell and sequencing primer binding regions for current Illumina sequencers. The amplified fragment has a size of ~157 bp and can be sequenced directly after purification (one step PCR). Up to 10 samples can be uniquely tagged from forward and reverse direction and pooled in one NextSeq run. The bases used for shifting on Ins\_F and Ins\_R can be used to uniquely tag samples (inline barcodes). It is recommended that all 10 primer pairs are used in the following combination to maximize sequence diversity and reduce effects of tag switching by uniquely tagging samples from both sides:

P5\_Ins\_R0+P7\_Ins\_F4, P5\_Ins\_R1+P7\_Ins\_F3, P5\_Ins\_R2+P7\_Ins\_F2, P5\_Ins\_R3+P7\_Ins\_F1, P5\_Ins\_R4+P7\_Ins\_F0,  
 P5\_Ins\_F0+P7\_Ins\_R4, P5\_Ins\_F1+P7\_Ins\_R3, P5\_Ins\_F2+P7\_Ins\_R2, P5\_Ins\_F3+P7\_Ins\_R1, P5\_Ins\_F4+P7\_Ins\_R0
