# Supplementary material for: Testing the potential of a ribosomal 16S marker for DNA metabarcoding of insects
Source: PubMed Central journal article supplement (PMC4841222; doi:10.7717/peerj.1966), 2016-04-19
Supplement: peerj-04-1966-s002.pdf [file peerj-04-1966-s002.pdf]

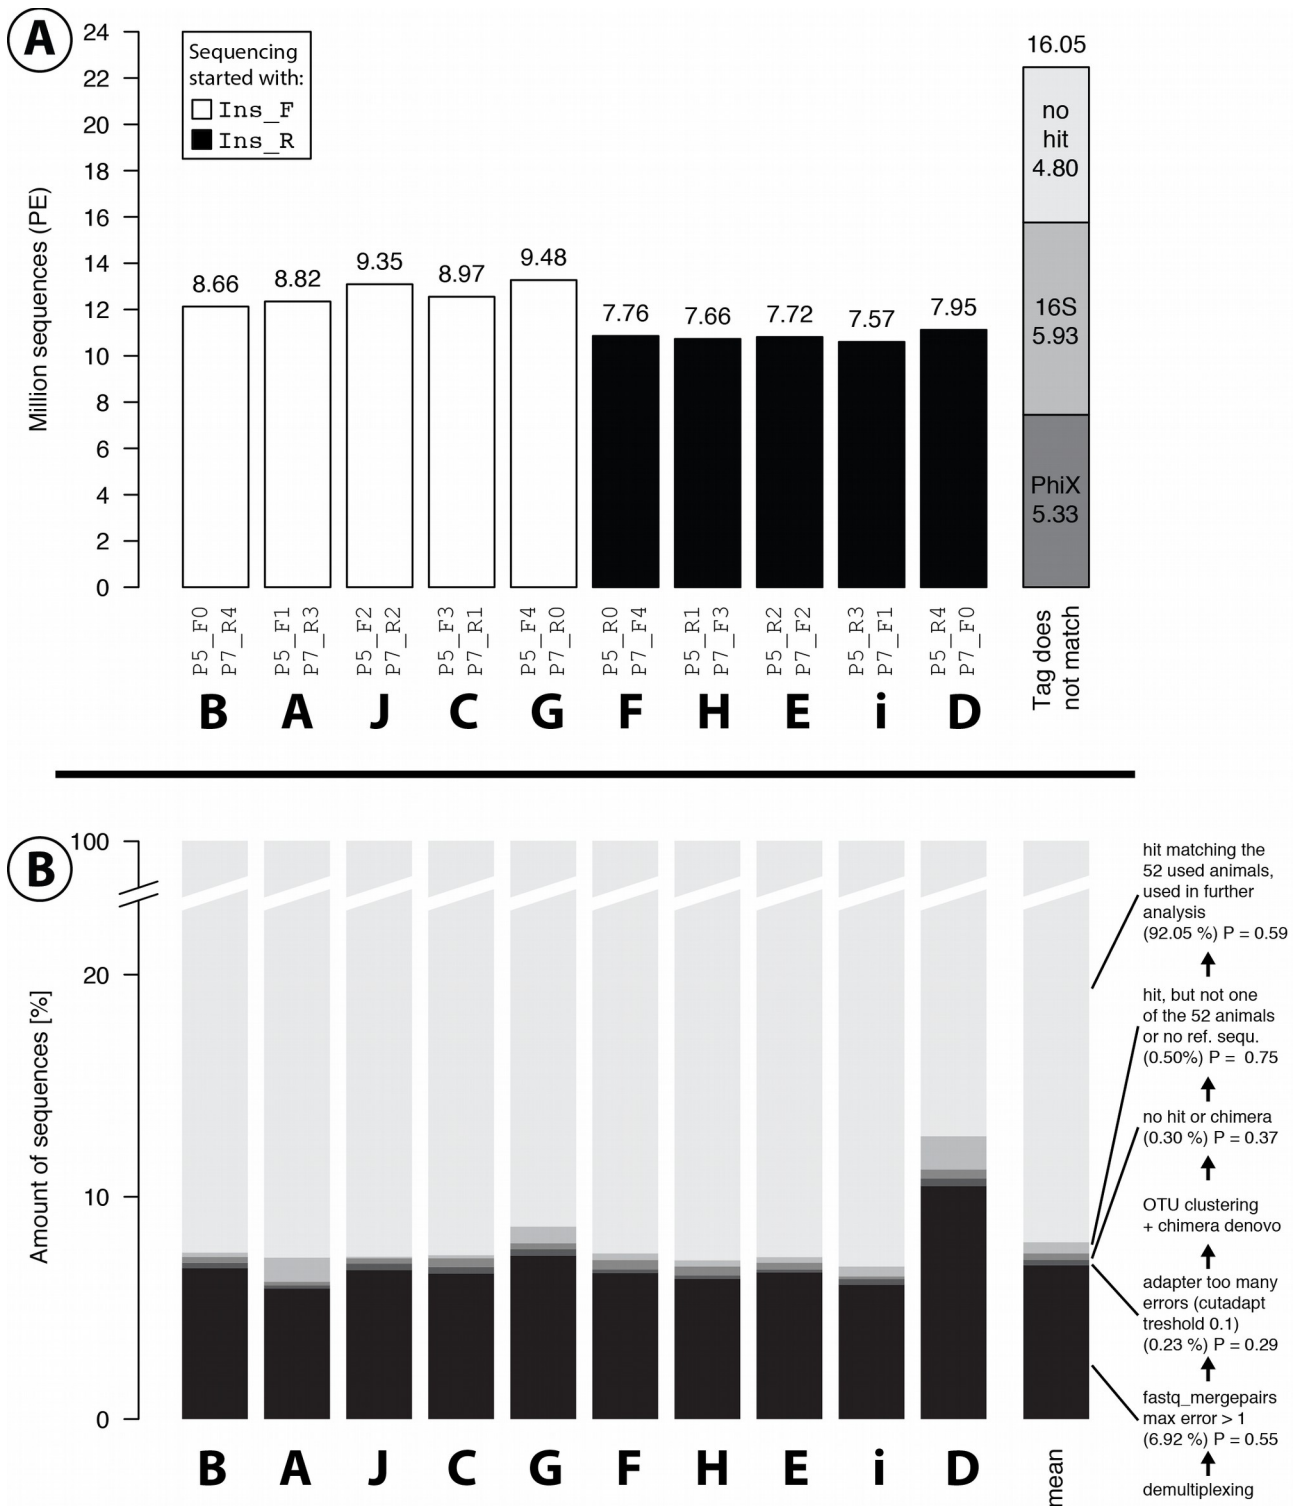

**Figure S2. Number of sequences obtained per sample after library demultiplexing (A) and percentage of sequences excluded in different bioinformatic analysis steps (B).** **A:** Library demultiplexing; Numbers above bars indicate the relative contribution (in percent) to the total number of sequences obtained for each sample. Sequencing started with Ins\_F (white) or Ins\_R (black) is indicated by bar color. **B:** Number of reads excluded in data processing steps. Mean percentage of sequence abundance in each processing step is written in brackets. Ins\_F / Ins\_R primer bias was tested with a t-test.
